# Supplementary material
Source: PubMed Central journal article supplement (PMC3651884)
Supplement: NIHMS390837-supplement-Supplementary_tables.pdf [file NIHMS390837-supplement-Supplementary_tables.pdf]

**Supplemental Table S1**

|                     |                        |                        |                        |
|---------------------|------------------------|------------------------|------------------------|
| <i>hsa-miR-21</i>   | <i>hsa-miR-19b</i>     | <i>hsa-miR-193a-5p</i> | <i>hsa-miR-1307</i>    |
| <i>hsa-5S-b5</i>    | <i>hsa-miR-26b</i>     | <i>hsa-miR-145</i>     | <i>hsa-let-7b*</i>     |
| <i>hsa-5S-b3</i>    | <i>hsa-miR-141</i>     | <i>hsa-miR-34a</i>     | <i>hsa-miR-1228*</i>   |
| <i>hsa-miR-1826</i> | <i>hsa-miR-106b</i>    | <i>hsa-miR-22</i>      | <i>hsa-miR-152</i>     |
| <i>hsa-miR-200c</i> | <i>hsa-miR-483-5p</i>  | <i>hsa-miR-31</i>      | <i>hsa-miR-1229</i>    |
| <i>hsa-miR-1246</i> | <i>hsa-miR-30d</i>     | <i>hsa-miR-296-5p</i>  | <i>hsa-miR-324-5p</i>  |
| <i>hsa-5S-b2</i>    | <i>hsa-miR-10b</i>     | <i>hsa-miR-936</i>     | <i>hsa-miR-1307</i>    |
| <i>hsa-miR-26a</i>  | <i>hsa-miR-20b</i>     | <i>hsa-miR-625*</i>    | <i>hsa-let-7b*</i>     |
| <i>hsa-miR-200b</i> | <i>hsa-miR-663</i>     | <i>hsa-miR-484</i>     | <i>hsa-miR-1228*</i>   |
| <i>hsa-miR-92a</i>  | <i>hsa-miR-7</i>       | <i>hsa-miR-132</i>     | <i>hsa-miR-140-3p</i>  |
| <i>hsa-miR-23a</i>  | <i>hsa-miR-574-5p</i>  | <i>hsa-miR-625</i>     | <i>hsa-miR-1181</i>    |
| <i>hsa-miR-23b</i>  | <i>hsa-miR-183</i>     | <i>hsa-miR-532-5p</i>  | <i>hsa-miR-1201</i>    |
| <i>hsa-let-7a</i>   | <i>hsa-let-7e</i>      | <i>hsa-miR-1305</i>    | <i>hsa-miR-1300</i>    |
| <i>hsa-miR-923</i>  | <i>hsa-miR-1308</i>    | <i>hsa-miR-1281</i>    | <i>hsa-miR-214</i>     |
| <i>hsa-let-7f</i>   | <i>hsa-miR-215</i>     | <i>hsa-miR-28-5p</i>   | <i>hsa-miR-1825</i>    |
| <i>hsa-miR-16</i>   | <i>hsa-miR-93</i>      | <i>hsa-let-7d*</i>     | <i>hsa-miR-1182</i>    |
| <i>hsa-miR-24</i>   | <i>hsa-miR-181a</i>    | <i>hsa-miR-1249</i>    | <i>hsa-miR-1301</i>    |
| <i>hsa-miR-203</i>  | <i>hsa-miR-30b</i>     | <i>hsa-miR-197</i>     | <i>hsa-miR-193b*</i>   |
| <i>hsa-let-7b</i>   | <i>hsa-miR-10a</i>     | <i>hsa-miR-181b</i>    | <i>hsa-miR-1306</i>    |
| <i>hsa-let-7c</i>   | <i>hsa-miR-768-5p</i>  | <i>hsa-miR-671-5p</i>  | <i>hsa-miR-490-3p</i>  |
| <i>hsa-miR-638</i>  | <i>hsa-miR-1280</i>    | <i>hsa-miR-1290</i>    | <i>hsa-miR-33b*</i>    |
| <i>hsa-5S-b4</i>    | <i>hsa-miR-361-5p</i>  | <i>hsa-miR-195</i>     | <i>hsa-miR-143</i>     |
| <i>hsa-miR-192</i>  | <i>hsa-miR-15a</i>     | <i>hsa-miR-331-3p</i>  | <i>hsa-miR-665</i>     |
| <i>hsa-let-7d</i>   | <i>hsa-miR-1268</i>    | <i>hsa-miR-629</i>     | <i>hsa-miR-30c-1*</i>  |
| <i>hsa-miR-27a</i>  | <i>hsa-miR-584</i>     | <i>hsa-miR-1237</i>    | <i>hsa-miR-1225-5p</i> |
| <i>hsa-miR-27b</i>  | <i>hsa-miR-720</i>     | <i>hsa-miR-454</i>     | <i>hsa-miR-1270</i>    |
| <i>hsa-miR-194</i>  | <i>hsa-miR-425</i>     | <i>hsa-miR-181c</i>    | <i>hsa-miR-135a*</i>   |
| <i>hsa-let-7g</i>   | <i>hsa-miR-768-3p</i>  | <i>hsa-miR-1238</i>    | <i>hsa-miR-423-3p</i>  |
| <i>hsa-miR-29a</i>  | <i>hsa-miR-224</i>     | <i>hsa-miR-1207-5p</i> | <i>hsa-miR-490-5p</i>  |
| <i>hsa-miR-375</i>  | <i>hsa-miR-574-3p</i>  | <i>hsa-miR-7-1*</i>    | <i>hsa-miR-377</i>     |
| <i>hsa-miR-20a</i>  | <i>hsa-miR-185</i>     | <i>hsa-miR-99b</i>     | <i>hsa-miR-433</i>     |
| <i>hsa-miR-92b</i>  | <i>hsa-miR-151-3p</i>  | <i>hsa-miR-150*</i>    | <i>hsa-miR-199a-3p</i> |
| <i>hsa-5S-b1</i>    | <i>hsa-miR-30c</i>     | <i>hsa-miR-125b</i>    | <i>hsa-miR-411</i>     |
| <i>hsa-miR-222</i>  | <i>hsa-miR-130b</i>    | <i>hsa-miR-1224-5p</i> | <i>hsa-miR-196a</i>    |
| <i>hsa-miR-1275</i> | <i>hsa-miR-429</i>     | <i>hsa-miR-877</i>     | <i>hsa-miR-105</i>     |
| <i>hsa-let-7i</i>   | <i>hsa-miR-128</i>     | <i>hsa-miR-765</i>     | <i>hsa-miR-1244</i>    |
| <i>hsa-miR-182</i>  | <i>hsa-miR-939</i>     | <i>hsa-miR-455-3p</i>  | <i>hsa-miR-187*</i>    |
| <i>hsa-miR-15b</i>  | <i>hsa-miR-940</i>     | <i>hsa-miR-424*</i>    | <i>hsa-miR-422a</i>    |
| <i>hsa-miR-320a</i> | <i>hsa-miR-200b*</i>   | <i>hsa-miR-489</i>     |                        |
| <i>hsa-miR-146a</i> | <i>hsa-miR-23a*</i>    | <i>hsa-miR-1234</i>    |                        |
| <i>hsa-miR-17</i>   | <i>hsa-miR-30e</i>     | <i>hsa-miR-191*</i>    |                        |
| <i>hsa-miR-25</i>   | <i>hsa-miR-575</i>     | <i>hsa-miR-10a*</i>    |                        |
| <i>hsa-miR-106a</i> | <i>hsa-miR-30a</i>     | <i>hsa-miR-1228</i>    |                        |
| <i>hsa-miR-320b</i> | <i>hsa-miR-18a</i>     | <i>hsa-miR-152</i>     |                        |
| <i>hsa-miR-200a</i> | <i>hsa-miR-125a-5p</i> | <i>hsa-miR-1229</i>    |                        |
| <i>hsa-miR-320d</i> | <i>hsa-miR-29c</i>     | <i>hsa-miR-324-5p</i>  |                        |

Supplemental Table S2

| Datasets | miRs                   |                        |
|----------|------------------------|------------------------|
|          | <i>miR-23a</i>         | <i>miR-27a</i>         |
| GSE20916 | $5.51 \times 10^{-10}$ | $1.86 \times 10^{-10}$ |
| GSE14333 | 0.0013                 | 0.0038                 |
| GSE17536 | 0.0138                 | 0.0151                 |
