# Supplementary material
Source: PubMed Central journal article supplement (PMC3651884)

**Figure S1**

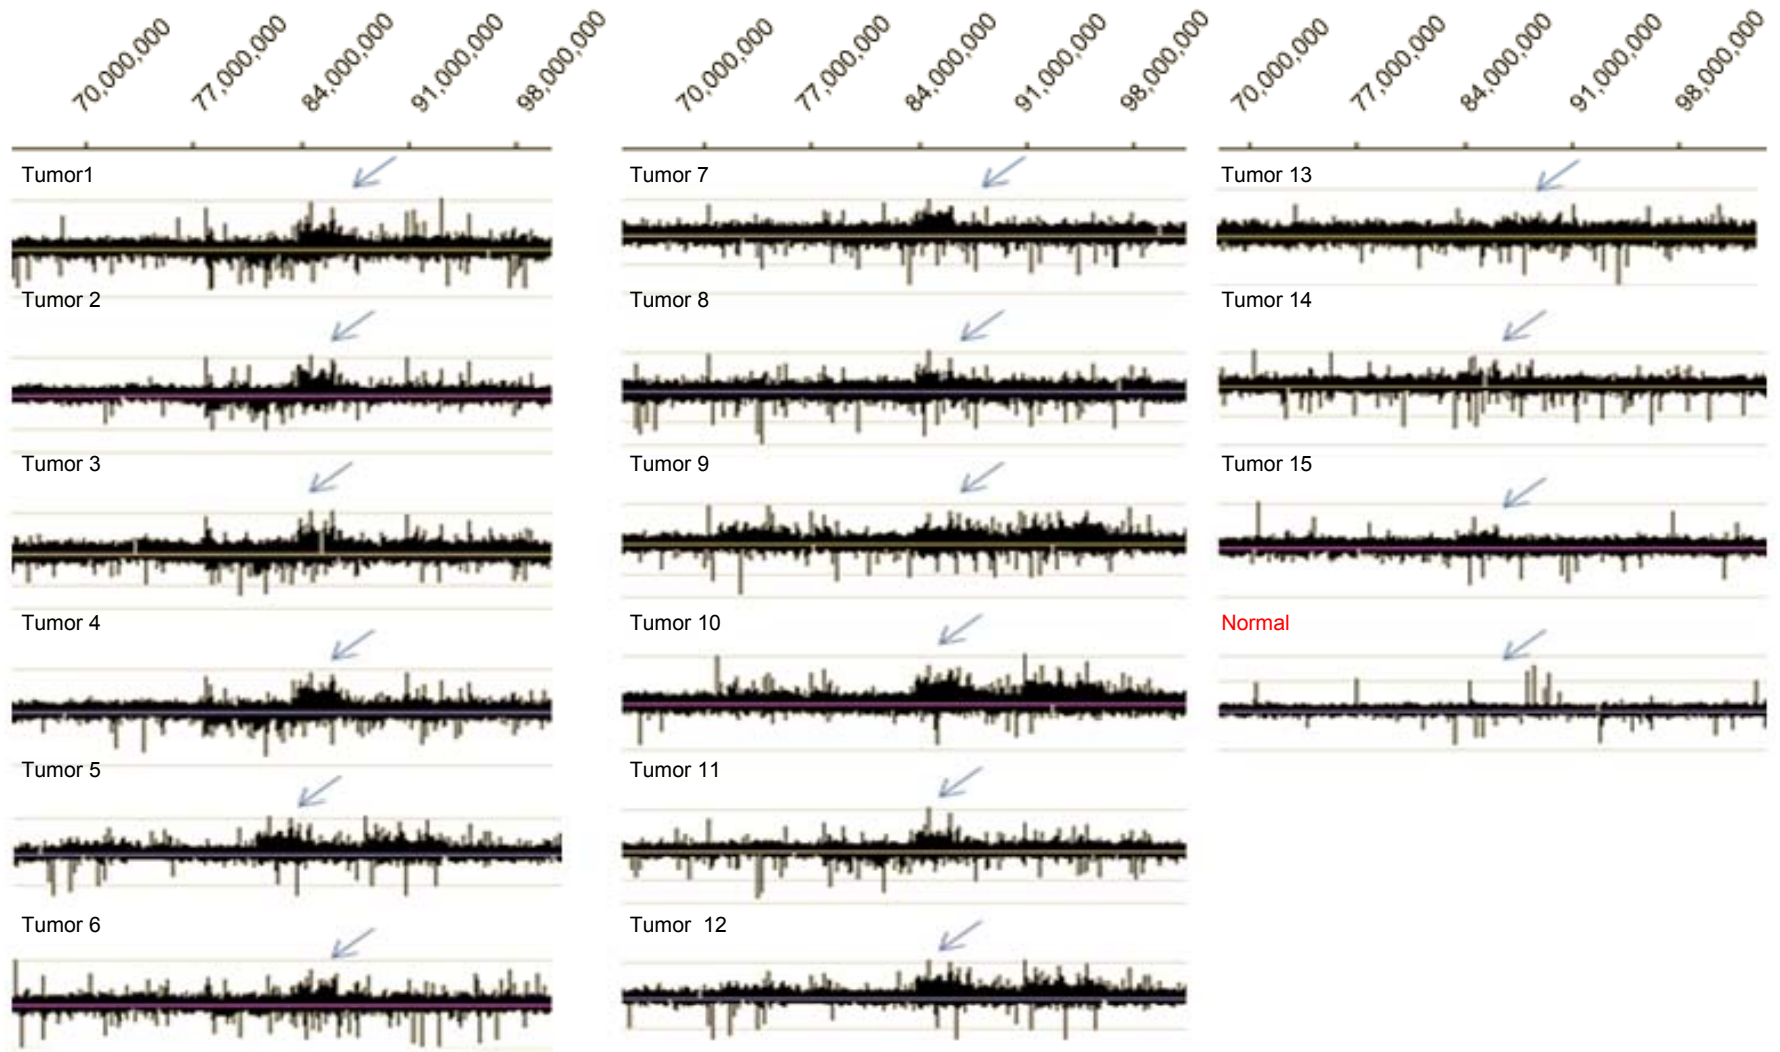

Figure S2

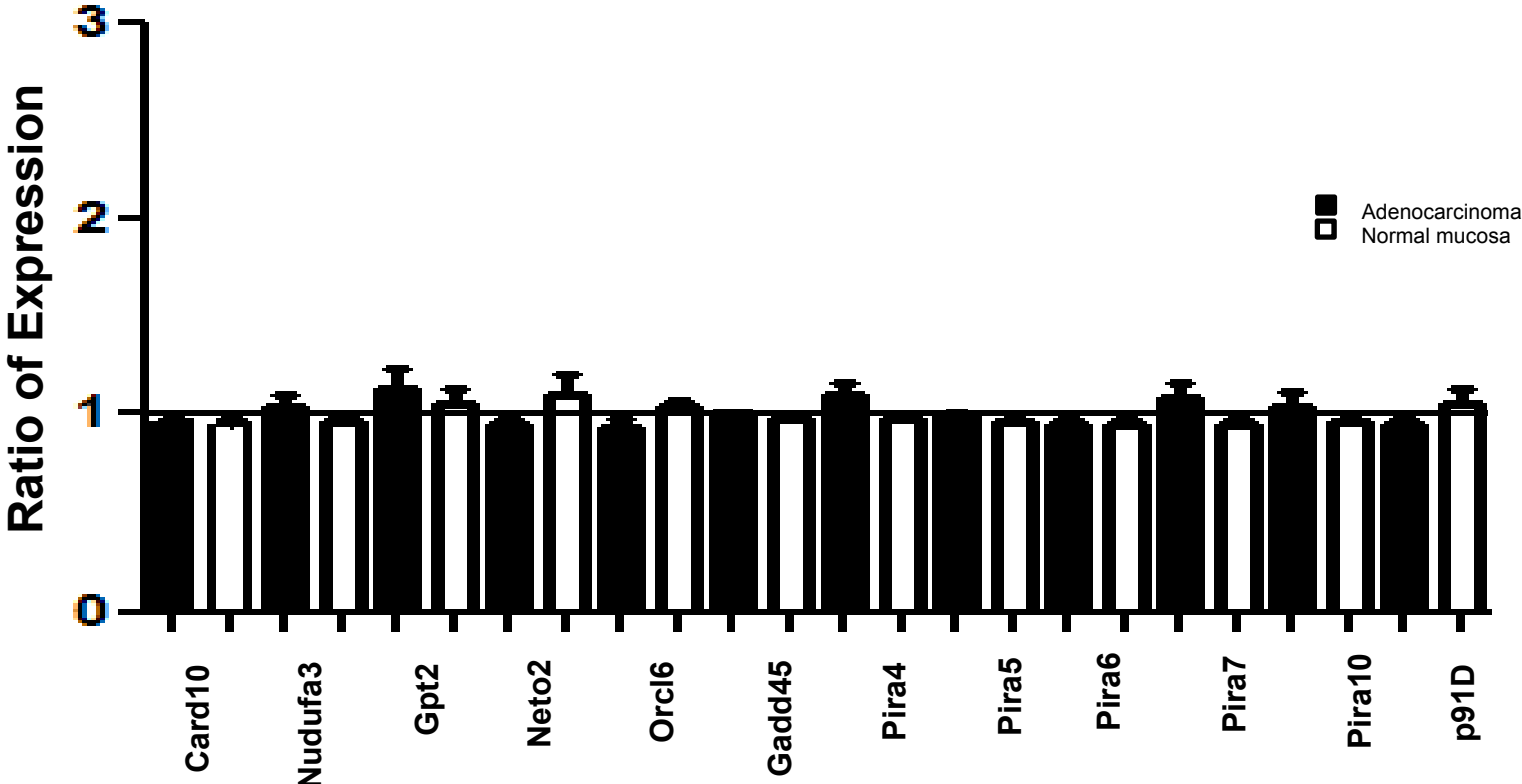

**Figure S3**

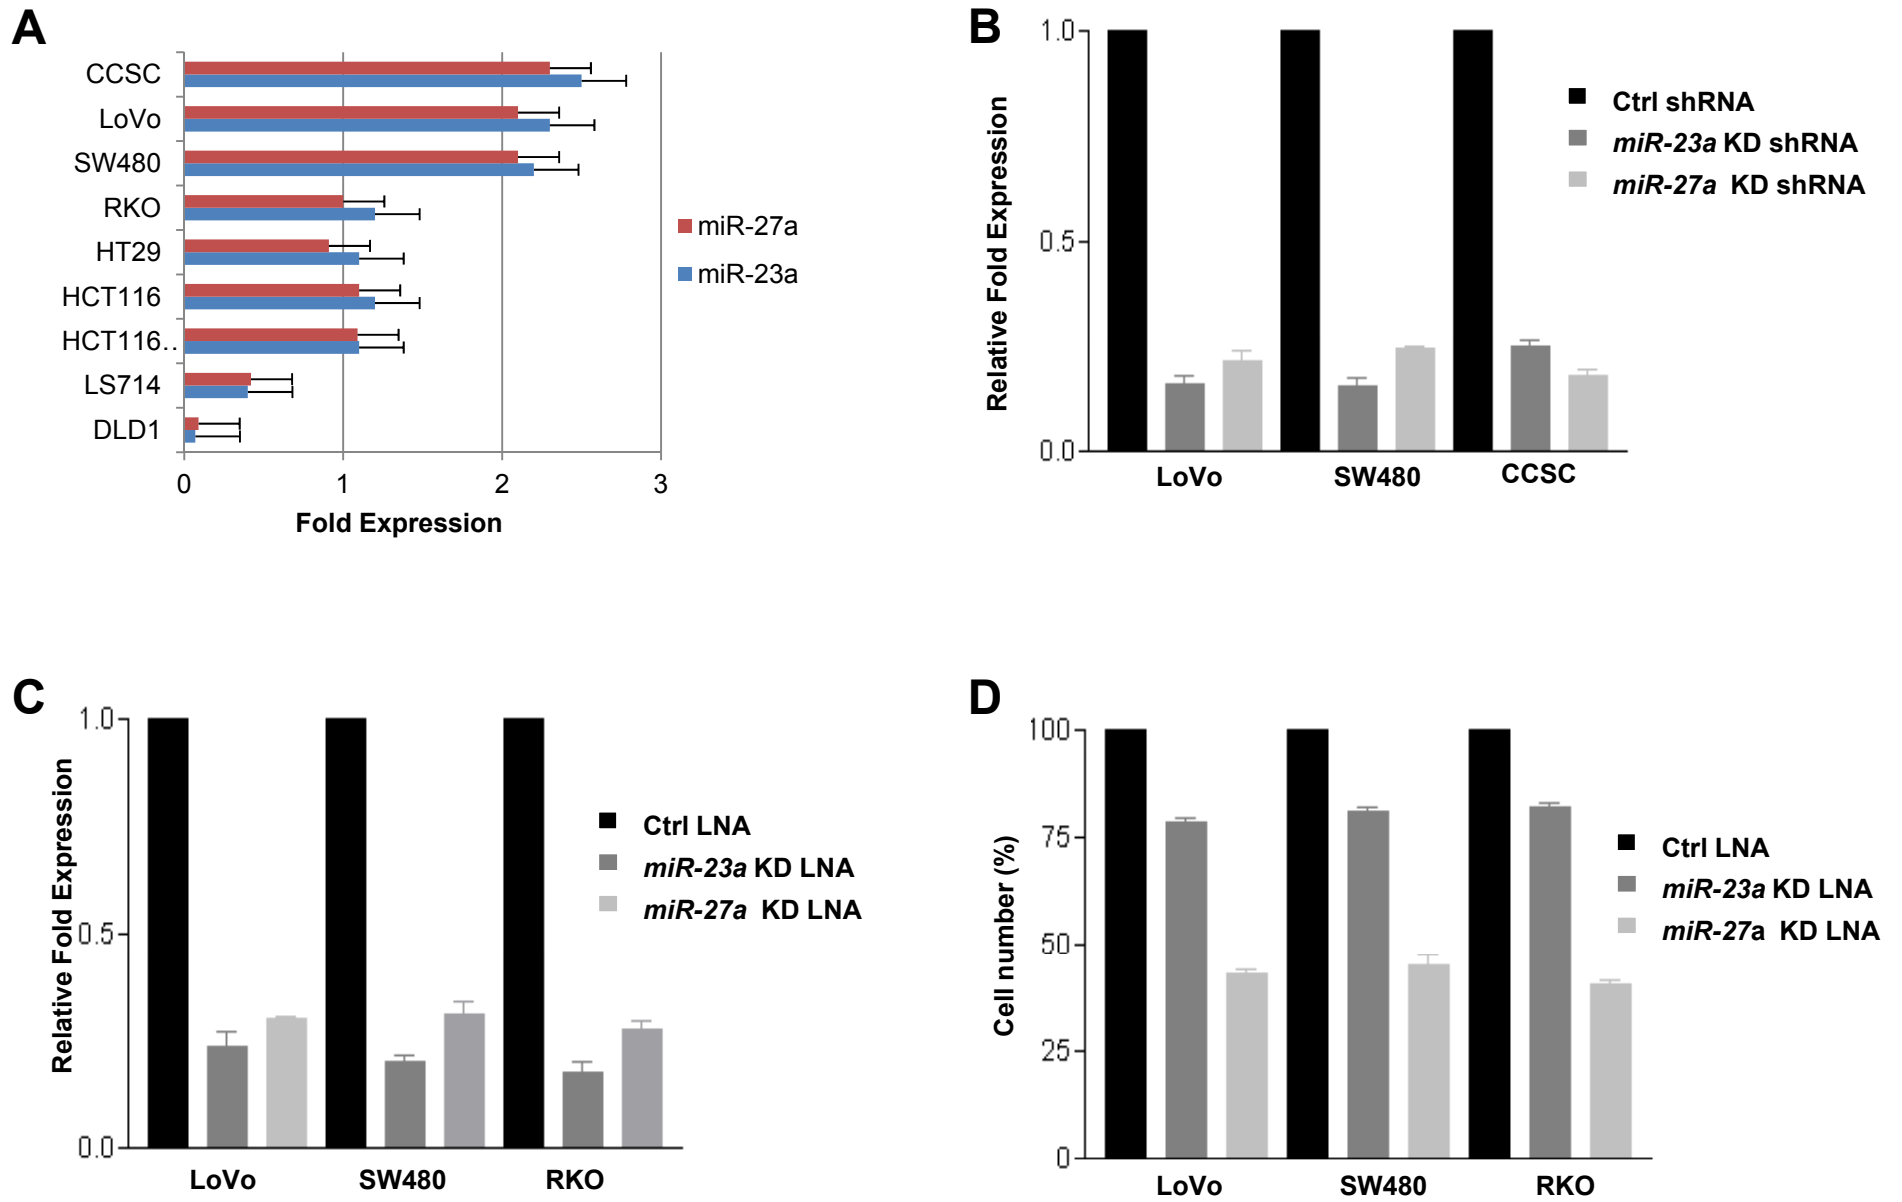

**Figure S4**

**A**

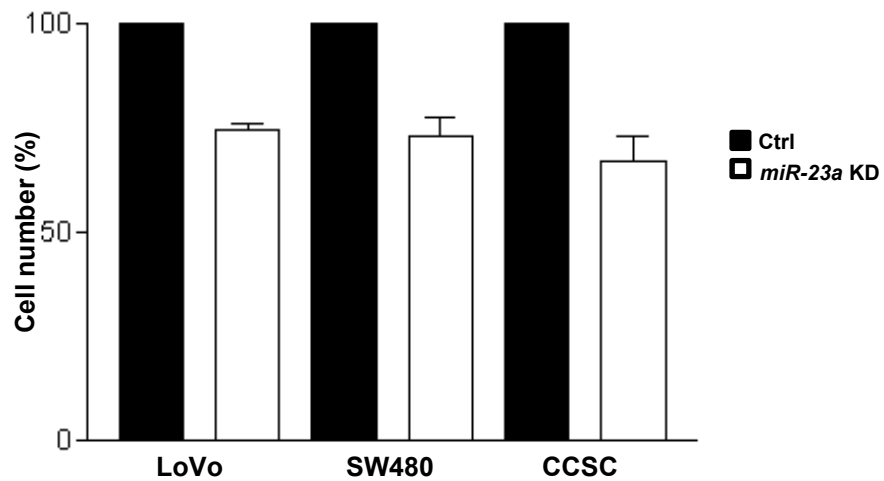

**B**

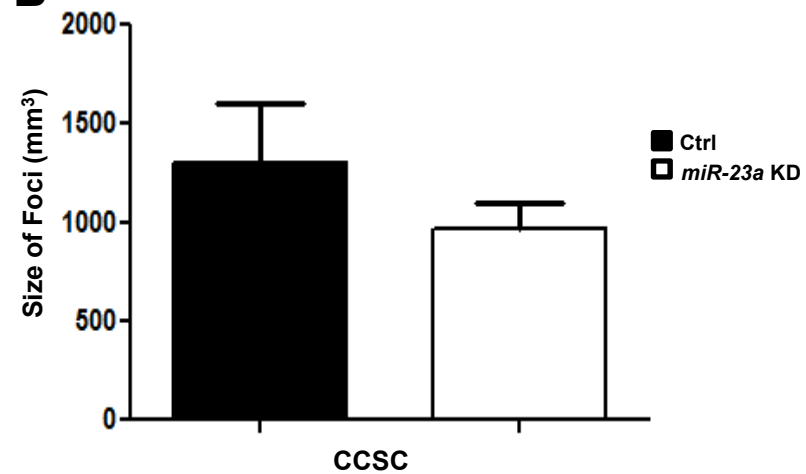

**C**

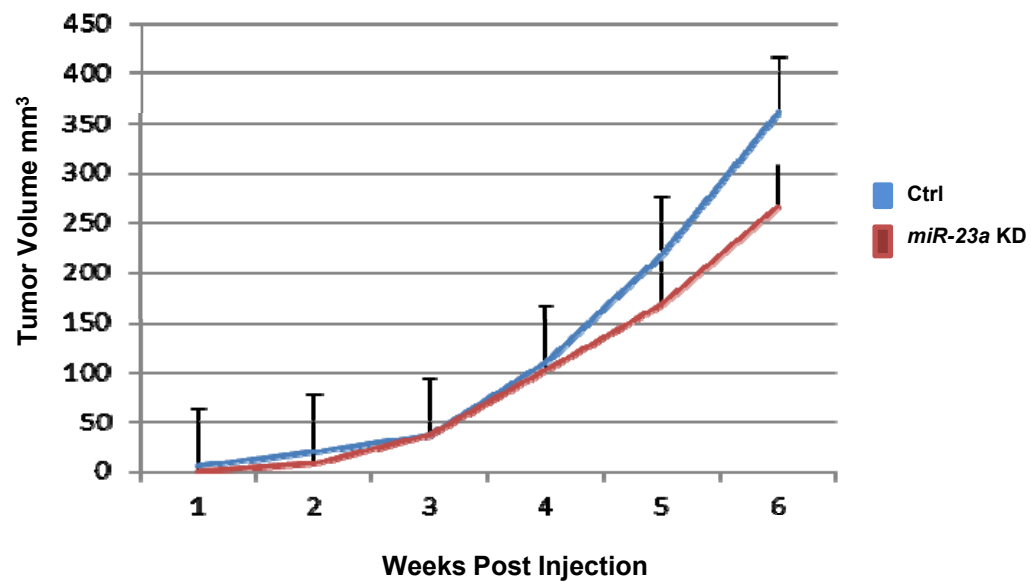

Figure S5

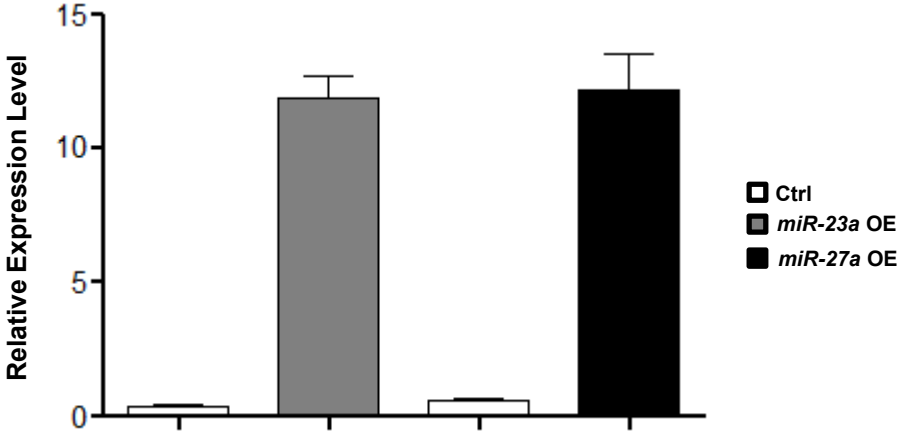

**Figure S6**

**A**

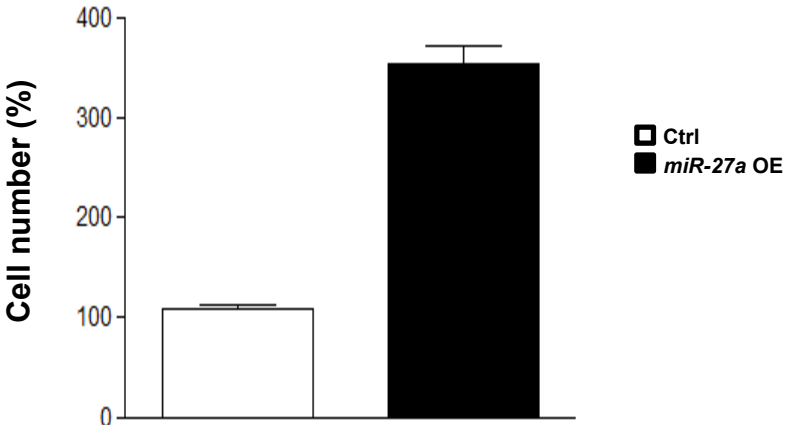

**B**

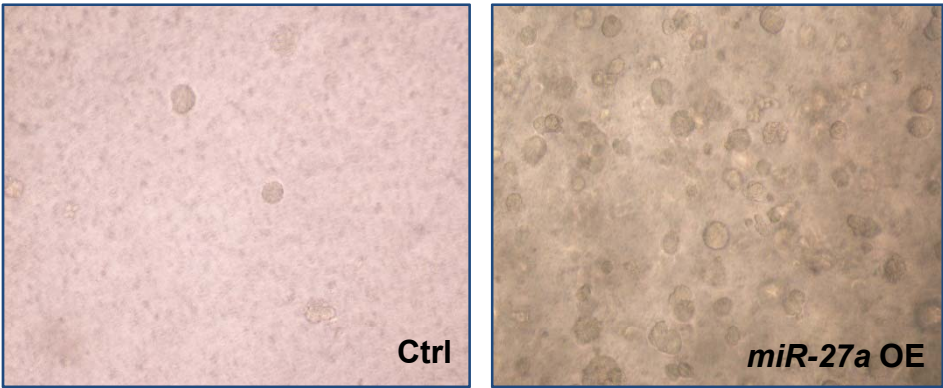

**C**

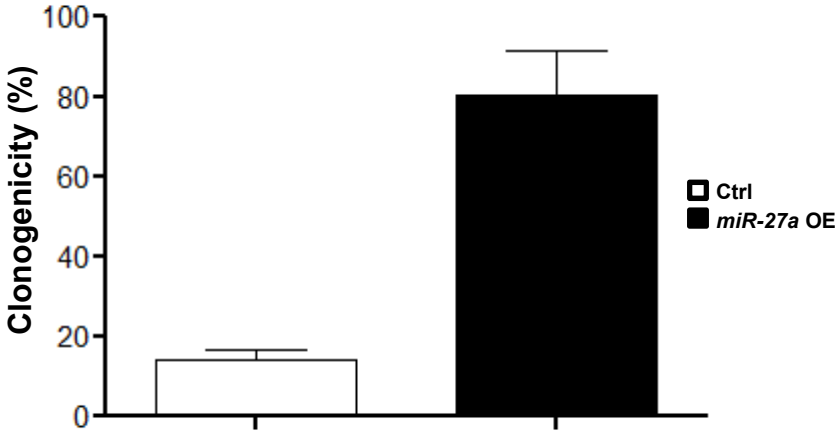

Figure S7

A

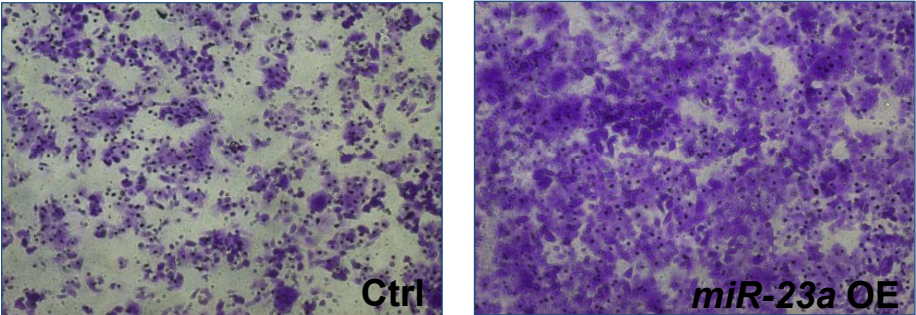

B

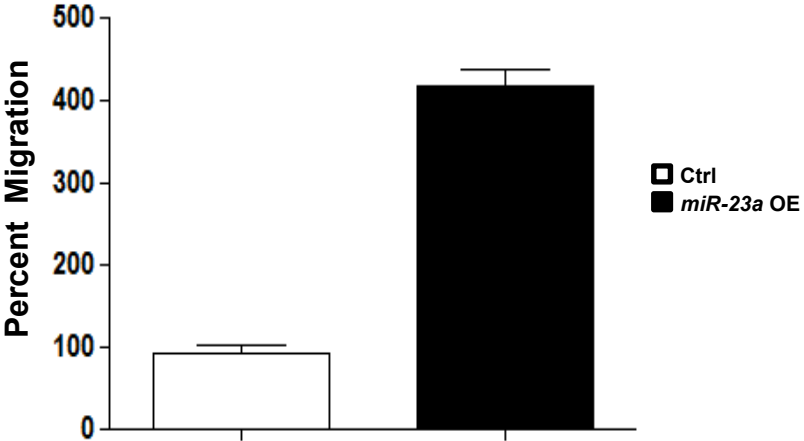

C

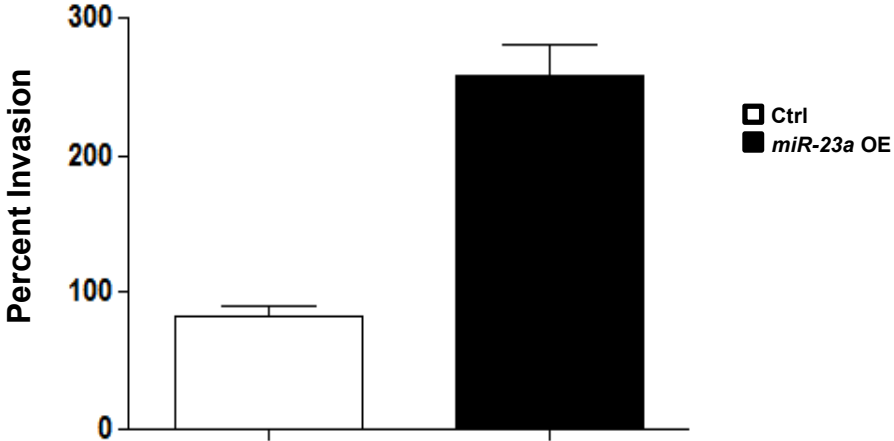

**Figure S8**

**A**

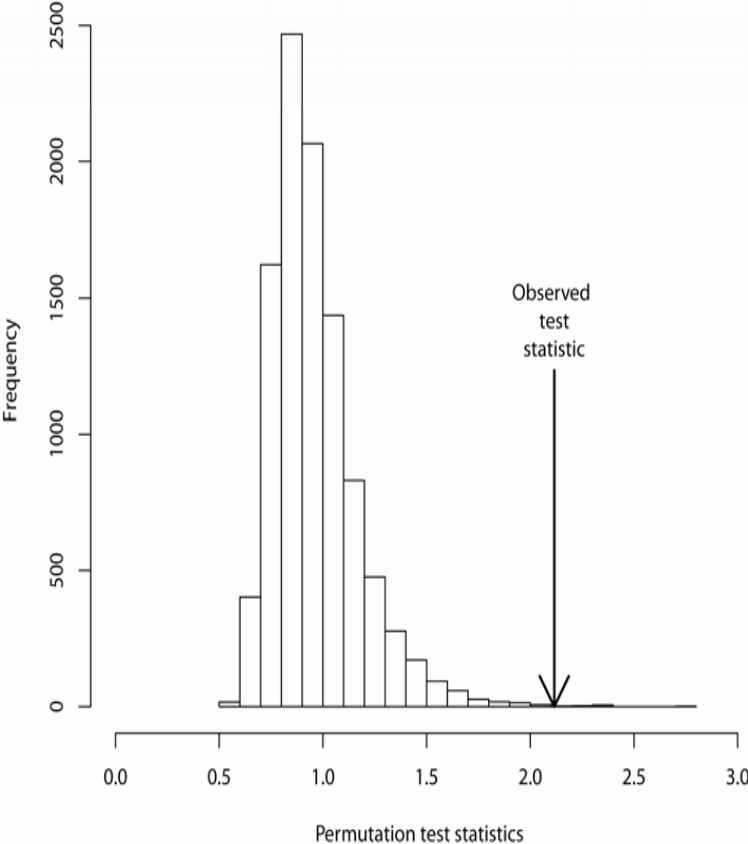

**B**

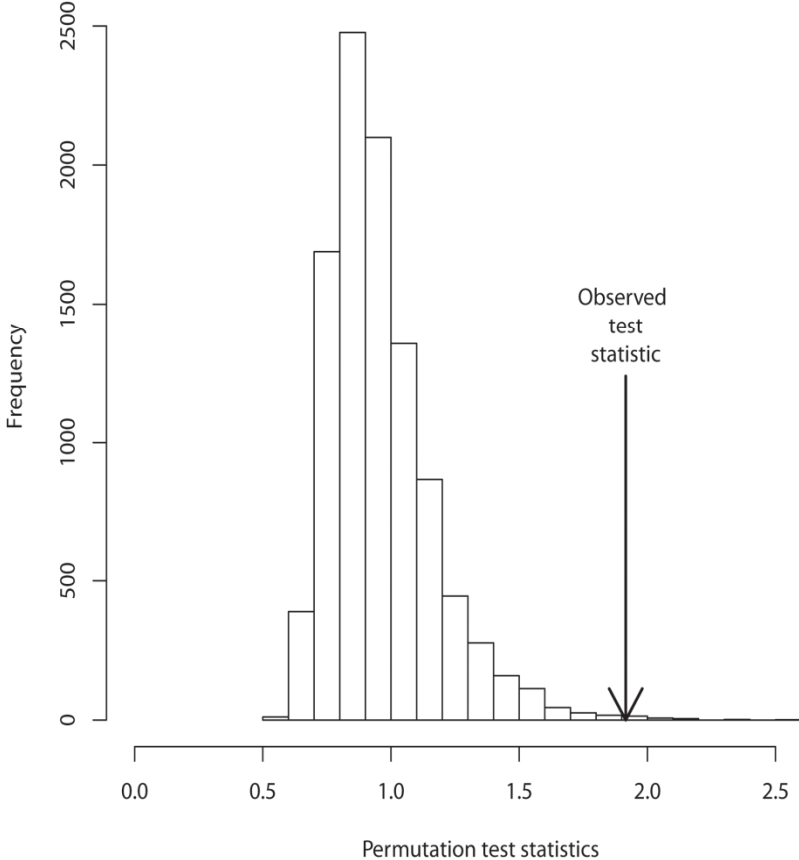



**Figure S9**

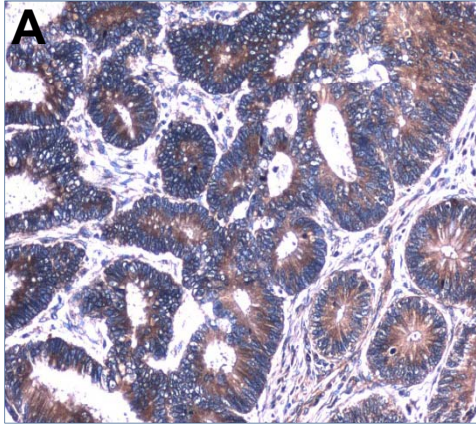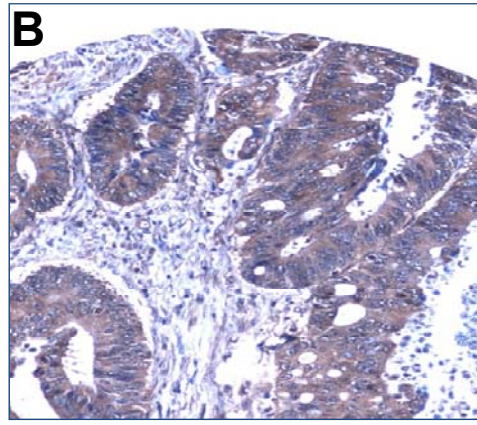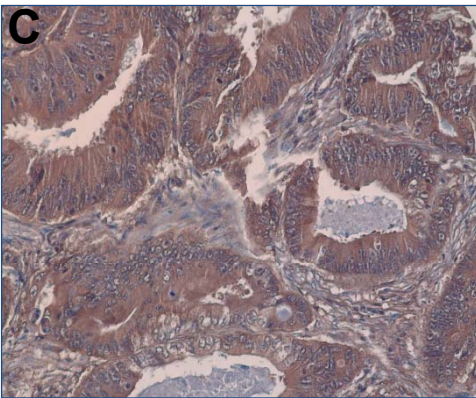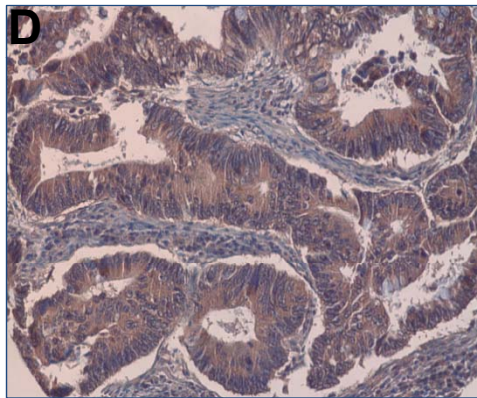

Supplement: NIHMS390837-supplement-Supplementary_figures.pdf [file NIHMS390837-supplement-Supplementary_figures.pdf]
